# Supplementary material for: Photosystem II Function and Dynamics in Three Widely Used Arabidopsis thaliana Accessions
Source: PubMed Central journal article supplement (PMC3460815; doi:10.1371/journal.pone.0046206), 2012-09-28
Supplement: pone.0046206.s004.pdf [file pone.0046206.s004.pdf]

**Table S1.** Leaf biomass and chlorophyll content of Col-0, Ws-4 and *Ler*-0 accessions grown on soil. The parameters were measured on plants grown for six weeks on soil at an irradiance of 120  $\mu\text{mol photons m}^{-2} \text{s}^{-1}$  and were expressed as means  $\pm$ SD (n=number of replicates). The parameters are also expressed relative to Col-0. \*, Significantly different from Col-0 (Student's t-test  $P < 0.05$ ).

| Accession     | Shoot fresh weight                     | Leaf specific mass                  | Leaf chlorophyll content <sup>a</sup> |                                    |                         |
|---------------|----------------------------------------|-------------------------------------|---------------------------------------|------------------------------------|-------------------------|
|               | <i>g plant</i> <sup>-1</sup><br>(n=16) | <i>mg cm</i> <sup>-2</sup><br>(n=8) | <i>μg cm</i> <sup>-2</sup><br>(n=8)   | <i>mg g</i> <sup>-1</sup><br>(n=8) | <i>Chl a/b</i><br>(n=8) |
| Col-0         | 1.59±0.32<br>100%                      | 17.95±0.99<br>100%                  | 19.93±2.30<br>100%                    | 1.11±0.14<br>100%                  | 3.93±0.10               |
| Ws-4          | 1.51±0.32<br>95%                       | 13.82±1.05*<br>77%                  | 15.35±3.68*<br>77%                    | 1.13±0.30<br>101%                  | 3.93±0.11               |
| <i>Ler</i> -0 | 1.35±0.33*<br>85%                      | 16.86±1.01<br>94%                   | 20.12±1.73<br>101%                    | 1.19±0.10<br>107%                  | 3.78±0.11               |

<sup>a</sup>Leaf chlorophyll content was measured spectrophotometrically after extraction in ethanol.
