# Supplementary material for: Photosystem II Function and Dynamics in Three Widely Used Arabidopsis thaliana Accessions
Source: PubMed Central journal article supplement (PMC3460815; doi:10.1371/journal.pone.0046206), 2012-09-28
Supplement: pone.0046206.s006.pdf [file pone.0046206.s006.pdf]

**Table S3.** Thylakoid lipid content of leaf tissue from Col-0, Ws-4 and *Ler-0* accessions. Lipids were extracted from leaves harvested from plants grown on soil for six weeks at an irradiance of 120  $\mu\text{mol photons m}^{-2} \text{s}^{-1}$ .

| Accession    | MGDG                   |                       | DGDG                   |                       | SQDG                   |                       | PG                     |                       |
|--------------|------------------------|-----------------------|------------------------|-----------------------|------------------------|-----------------------|------------------------|-----------------------|
|              | $\mu\text{mol g}^{-1}$ | $\text{nmol cm}^{-2}$ | $\mu\text{mol g}^{-1}$ | $\text{nmol cm}^{-2}$ | $\mu\text{mol g}^{-1}$ | $\text{nmol cm}^{-2}$ | $\mu\text{mol g}^{-1}$ | $\text{nmol cm}^{-2}$ |
| Col-0        | 1.82±0.07              | 32.67±0.80            | 0.97±0.05              | 17.41±0.60            | 0.20±0.01              | 3.59±0.20             | 0.70±0.05              | 12.56±0.70            |
|              | 100%                   | 100%                  | 100%                   | 100%                  | 100%                   | 100%                  | 100%                   | 100%                  |
| Ws-4         | 2.37±0.08*             | 32.75±0.60            | 1.36±0.08*             | 18.79±0.70            | 0.23±0.01              | 3.18±0.10             | 0.90±0.10              | 12.43±0.80            |
|              | 130%                   | 100%                  | 140%                   | 108%                  | 115%                   | 89%                   | 129%                   | 99%                   |
| <i>Ler-0</i> | 1.74±0.01              | 29.33±0.10            | 1.04±0.01              | 17.53±0.10            | 0.19±0.01              | 3.20±0.10             | 0.67±0.02              | 11.29±0.30            |
|              | 96%                    | 90%                   | 107%                   | 100%                  | 95%                    | 89%                   | 96%                    | 90%                   |

The lipid content was expressed as means  $\pm$ SD (n=3) on a leaf fresh weight and leaf area basis. The lipid content was also expressed relative to Col-0. \*, Significantly different from Col-0 (Student's t-test  $P < 0.05$ ).
