# Supplementary material for: Photosystem II Function and Dynamics in Three Widely Used Arabidopsis thaliana Accessions
Source: PubMed Central journal article supplement (PMC3460815; doi:10.1371/journal.pone.0046206), 2012-09-28
Supplement: pone.0046206.s007.pdf [file pone.0046206.s007.pdf]

**Table S4.** Relative amounts of various types of PSII complexes in Col-0, Ws-4, and *Ler-0* accessions. The plants were grown hydroponically for six weeks at an irradiance of 120  $\mu\text{mol photons m}^{-2} \text{s}^{-1}$  and treated for 3 h at an irradiance of 950  $\mu\text{mol photons m}^{-2} \text{s}^{-1}$  (high light) in the absence or presence of lincomycin (LN). Thylakoid membranes were isolated and solubilized mildly with n-dodecyl- $\beta$ -D-maltoside, and the various types of Chl protein complexes were separated by Blue-native gel electrophoresis. As dark control, 16 h dark-adapted plants were used.

| Dark-adapted                | Col-0      | Ws-4        | <i>Ler-0</i> |
|-----------------------------|------------|-------------|--------------|
| PSII-LHCII supercomplex     | 20 $\pm$ 2 | 20 $\pm$ 2  | 32 $\pm$ 5   |
| PSII core dimer             | 13 $\pm$ 1 | 10 $\pm$ 1  | 10 $\pm$ 2   |
| PSII core monomer           | 40 $\pm$ 2 | 39 $\pm$ 2  | 36 $\pm$ 1   |
| PSII core CP43-less monomer | 27 $\pm$ 1 | 31 $\pm$ 1  | 22 $\pm$ 1   |
| PSII monomer : PSII dimer   | 2:1        | 2:1         | 1.5:1        |
| High light - LN             | Col-0      | Ws-4        | <i>Ler-0</i> |
| PSII-LHCII supercomplex     | 7 $\pm$ 2  | 4 $\pm$ 2   | 7 $\pm$ 1    |
| PSII core dimer             | 14 $\pm$ 2 | 9 $\pm$ 1   | 9 $\pm$ 1    |
| PSII core monomer           | 35 $\pm$ 5 | 40 $\pm$ 3  | 36 $\pm$ 2   |
| PSII core CP43-less monomer | 44 $\pm$ 5 | 47 $\pm$ 1  | 48 $\pm$ 3   |
| PSII monomer : PSII dimer   | 4:1        | 7:1         | 5:1          |
| High light + LN             | Col-0      | Ws-4        | <i>Ler-0</i> |
| PSII-LHCII supercomplex     | 5 $\pm$ 2  | 1 $\pm$ 0*  | 4 $\pm$ 2    |
| PSII core dimer             | 15 $\pm$ 2 | 4 $\pm$ 2*  | 8 $\pm$ 3    |
| PSII core monomer           | 35 $\pm$ 3 | 40 $\pm$ 3  | 41 $\pm$ 3   |
| PSII core CP43-less monomer | 45 $\pm$ 3 | 55 $\pm$ 3* | 46 $\pm$ 3   |
| PSII monomer : PSII dimer   | 4:1        | 20:1        | 7:1          |

The relative amounts of four types of PSII complexes were determined from the quantification of D1 protein in western blots of Blue-native gels as in Figure 11, and the ratio of PSII monomer-to-dimer was calculated for each accession and condition. Data represent means  $\pm$ SD of three independent preparations. \*, Significantly different from Col-0 and *Ler-0* (Student's t-test  $P < 0.01$ ).
