# Supplementary material for: Photosystem II Function and Dynamics in Three Widely Used Arabidopsis thaliana Accessions
Source: PLoS One. 2012 Sep 28;7(9):e46206. doi: 10.1371/journal.pone.0046206 (PMC3460815; doi:10.1371/journal.pone.0046206)
Supplement: Table S2 — Parameters of chloroplast ultrastructure in Col-0, Ws-4 and Ler-0 accessions. (PDF) [file pone.0046206.s005.pdf]

**Table S2.** Parameters of chloroplast ultrastructure in Col-0, Ws-4 and Ler-0 *Arabidopsis* accessions. The plants were grown hydroponically for 4 weeks at an irradiance of 120  $\mu\text{mol photons m}^{-2} \text{s}^{-1}$  (GL). HL samples originated from GL plants subsequently illuminated for 3 h with high-intensity light (HL=950  $\mu\text{mol photons m}^{-2} \text{s}^{-1}$ ).

| Parameter                        | Col-0                                                                   | Ws-4             | Ler-0             |
|----------------------------------|-------------------------------------------------------------------------|------------------|-------------------|
|                                  | <b>GL (120 <math>\mu\text{mol photons m}^{-2} \text{s}^{-1}</math>)</b> |                  |                   |
| Plastid length ( $\mu\text{m}$ ) | 6.2 $\pm$ 1.0                                                           | 6.1 $\pm$ 1.2    | 6.6 $\pm$ 1.3*    |
| Plastid width ( $\mu\text{m}$ )  | 3.6 $\pm$ 0.6                                                           | 3.5 $\pm$ 0.6    | 3.2 $\pm$ 0.7*    |
| Plastid width/length             | 0.6 $\pm$ 0.1                                                           | 0.6 $\pm$ 0.1    | 0.5 $\pm$ 0.1*    |
| Starch/plastid section           | 3.8 $\pm$ 1.7*                                                          | 3.0 $\pm$ 1.5    | 2.5 $\pm$ 1.8     |
| Grana/plastid section            | 60 $\pm$ 11*                                                            | 67 $\pm$ 14      | 70 $\pm$ 15       |
| Grana height                     | 6.2 $\pm$ 3.2                                                           | 5.8 $\pm$ 3.4    | 6.0 $\pm$ 3.9     |
| Grana width ( $\mu\text{m}$ )    | 0.53 $\pm$ 0.18**                                                       | 0.55 $\pm$ 0.20  | 0.56 $\pm$ 0.23** |
|                                  | <b>HL (950 <math>\mu\text{mol photons m}^{-2} \text{s}^{-1}</math>)</b> |                  |                   |
| Plastid length ( $\mu\text{m}$ ) | 6.8 $\pm$ 1.2                                                           | 6.3 $\pm$ 1.0**  | 7.0 $\pm$ 1.3**   |
| Plastid width ( $\mu\text{m}$ )  | 3.8 $\pm$ 0.7                                                           | 4.2 $\pm$ 0.7*   | 3.7 $\pm$ 0.9     |
| Plastid width/length             | 0.6 $\pm$ 0.1                                                           | 0.7 $\pm$ 0.1*   | 0.5 $\pm$ 0.2     |
| Starch/plastid section           | 3.7 $\pm$ 1.9                                                           | 3.2 $\pm$ 1.9    | 3.2 $\pm$ 2.0     |
| Grana/plastid section            | 55 $\pm$ 10**                                                           | 57 $\pm$ 12      | 62 $\pm$ 15**     |
| Grana height                     | 6.0 $\pm$ 3.3                                                           | 5.1 $\pm$ 2.6*   | 6.3 $\pm$ 4.0     |
| Grana width ( $\mu\text{m}$ )    | 0.54 $\pm$ 0.15                                                         | 0.51 $\pm$ 0.15* | 0.54 $\pm$ 0.17   |

The presented data were determined based on electron micrographs similar to those shown in Figures 1 and 10. Statistical analysis was performed for 50-80 plastids from each accession for most parameters, and the mean values  $\pm$ SD were presented. Data about grana height (number of appressed thylakoid lamellae) and width (defined at the middle of the granum) were determined from measurements on 250-657 grana from 50-80 representative plastids from 5-6 ultrathin sections from the cross sections of two different leaves of each type of treated sample. Student's t-test was used for the analyses of most of the ultrastructural data. However, when the data obtained (*e.g.* for grana height and length) failed normality analysis, the non-parametric method Mann-Whitney U-test per data pairs and Kruskal-Wallis test were used. Significant differences are indicated with \*\* between two different samples. \*, Significantly different in the indicated accession from the other two accessions ( $P < 0.05$ ).
